# Supplementary material for: Influence of Biological Therapeutics, Cytokines, and Disease Activity on Depression in Rheumatoid Arthritis
Source: J Immunol Res. 2018 Jul 17;2018:5954897. doi: 10.1155/2018/5954897 (PMC6083532; doi:10.1155/2018/5954897)
Supplement: Supplementary 1 — The post hoc power analysis of this project is included as Supplementary Table 1. This shows the likelihood of a type 2 statistical error for each comparison, based on the actual variance observed in our study. [file 5954897.f1.xlsx]

## Sheet: Post Hoc Analysis
	Supplementary Table 1. Post Hoc Power Analysis of Study Cohorts
	Characteristics	Linear and Logistic Regression				Characteristics	T test
		RA	Healthy	Depressed	SLE		RA	Healthy	Depressed	SLE
	Disease Duration	1	N/A	N/A	1	Age	1	1	1	1
	BMI	1	0.707	0.999	1	Education (yrs)	0.995	1	0.987	0.999
	Pain	1	0.974	1	1
	Smoking (Yes)	0.989	0.945	0.999	1		Chi-squared Test
	Drinking (Yes)	1	0.915	1	0.999		RA compared to:	Healthy	Depressed	SLE
	Physical Activity (Yes)	1	0.999	0.999	1	Education (lvl)		0.999	0.359	0.958
	Biologic Use (Yes)	0.999	N/A	N/A	N/A	Marrage Status		0.772	0.313	0.683
	Classic Med Use (Yes)	0.999	N/A	N/A	N/A	Employment Status (yes)		0.853	0.271	0.066
	Disease Activity (Patient)	1	N/A	N/A	N/A
	Disease Activity (Doctor)	1	N/A	N/A	N/A		Chi-squared Test
	SV	1	N/A	N/A	1		Month 1 compared to Month 2 in RA patients
	CRP	1	N/A	N/A	1	Smoking	0.05
	DAS28	1	N/A	N/A	N/A	Drinking	0.05
	Leukocytes	1	N/A	N/A	0.877	Physical Activity	0.05
	Brain Leukocytes	N/A	N/A	N/A	0.998	Biologic	0.998
	Lymphocytes	1	N/A	N/A	0.685	Classic Medication	0.114
	Brain Lymphocytes	N/A	N/A	N/A	0.973
	Anti-dsDNA Ig	N/A	N/A	N/A	0.999		T test
	Brain Anti-dsDNA Ig	N/A	N/A	N/A	0.984		Month 1 compared to Month 2 in RA patients
	IL-6	0.882	0.348	0.999	0.898		M1		M2
	IL-10	0.989	0.999	0.999	0.998	Pain Score	0.936		1
	TNF	0.63	0.998	0.999	0.889	Disease Activity (Patient)	0.6		0.938
	PSQI	1	0.999	1	1	Disease Activity (Doctor)	0.456		0.171
	RAS	1	0.999	0.995	1	Sedementation Velocity	0.567		0.028
	FSS	1	0.999	1	1	C-Reactive Protein	0.236		0.09
	Biologics					DAS28	0.056		0.036
	None	0.999				Leukocytes	0.999		0.418
	Abatacept	0.999				Lymphocytes	0.999		0.999
	Adalimumab	0.999				Anti-dsDNA	1		0.999
	Etamercept	0.62				HADS depression	0.367		0.929
	Golimumab	0.32				HADS anxiety	0.486		0.885
	Infliximab	0.999				PSQI	0.91		0.951
	Rituximab	1				Relationship Assessment Scale	1		0.999
	Tocilizumab	1				Fatigue Severity Scale	0.896		1
	Classic Medications
	Leflunomida	1				Multivariate Model
	Metotrexato	1				Sex	0.999
	Leflunomida & Metotrexato	1				Age	0.206
	Sulfassalizina	1				Marital Status	0.705
	Hidroxicloroquina + Leflunomida + Metotrexato	1				Education (yrs)	0.999
	Hidroxicloroquina + Metotrexato	0.999				Physical Activity	1
	Ciclosporina	0.624				Disease Activity (Doctor)	0.997
	Hidroxicloroquina + Leflunomida	0.999				RAS	1
	Sulfassalazina + Metotrexato	0.999				FSS	1
	Hidroxicloriquina	0.999
	Sulfassalazina + Hidroxicloroquina	0.999
	Sulfassalazina + Leflunomida	1
